# Supplementary material for: The CMS19 disease model specifies a pivotal role for collagen XIII in bone homeostasis
Source: PubMed Central journal article supplement (PMC8990013; doi:10.1038/s41598-022-09653-4), 2022-04-07
Supplement: 41598_2022_9653_MOESM1_ESM.pdf [file 41598_2022_9653_MOESM1_ESM.pdf]

# **The CMS19 disease model specifies a pivotal role for collagen XIII in bone homeostasis**

Kemppainen AV<sup>a</sup>, Finnilä MA<sup>b</sup>, Heikkinen A<sup>a</sup>, Härönen H<sup>a</sup>, Izzi V<sup>a,c,d</sup>,  
Kauppinen S<sup>b</sup>, Saarakkala S<sup>b,e</sup>, Pihlajaniemi T<sup>a</sup>, Koivunen J<sup>a,\*</sup>

<sup>a</sup>ECM-Hypoxia research unit, Faculty of Biochemistry and Molecular Medicine, University of Oulu, P.O. Box 5400, Oulu, FIN-90014, Finland

<sup>b</sup>Research Unit of Medical Imaging, Physics and Technology, University of Oulu, P.O. Box 5000, Oulu, FIN-90014, Finland

<sup>c</sup>Faculty of Medicine, University of Oulu, Oulu, FI-90014, Finland

<sup>d</sup>Finnish Cancer Institute, Helsinki, 00130, Finland

<sup>e</sup>Department of Diagnostic Radiology, Oulu University Hospital, Oulu, Finland

\*Correspondence: [jarkko.koivunen@oulu.fi](mailto:jarkko.koivunen@oulu.fi)

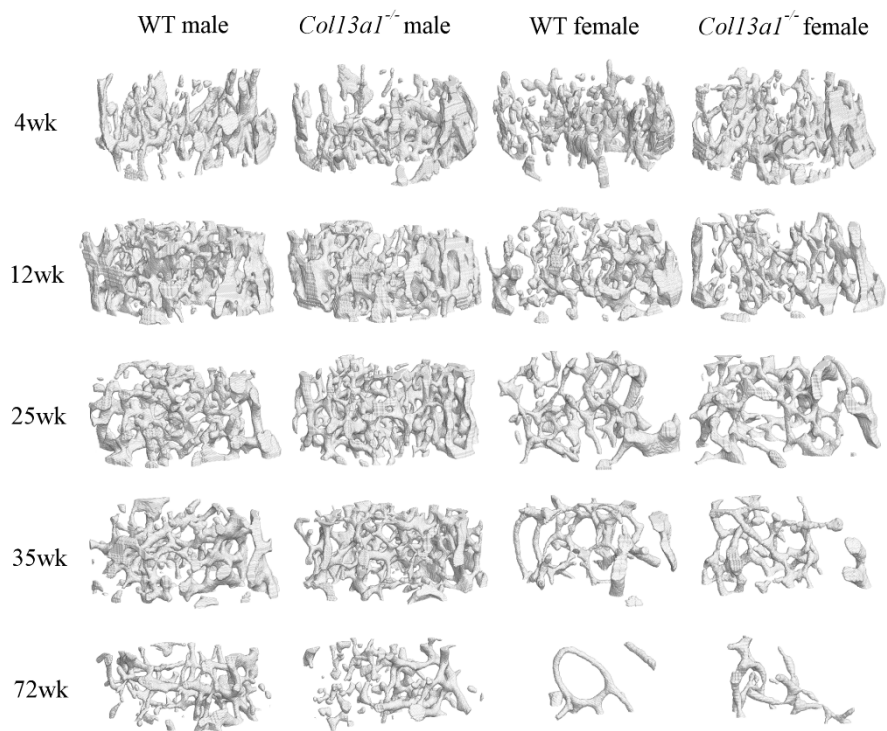

Fig S1. Representative 3D reconstruction images of distal femoral trabecular bone in *Col13a1*<sup>-/-</sup> male and female mice and respective controls. The trabecular architecture and the bone mass were similar between genotypes at all time points.

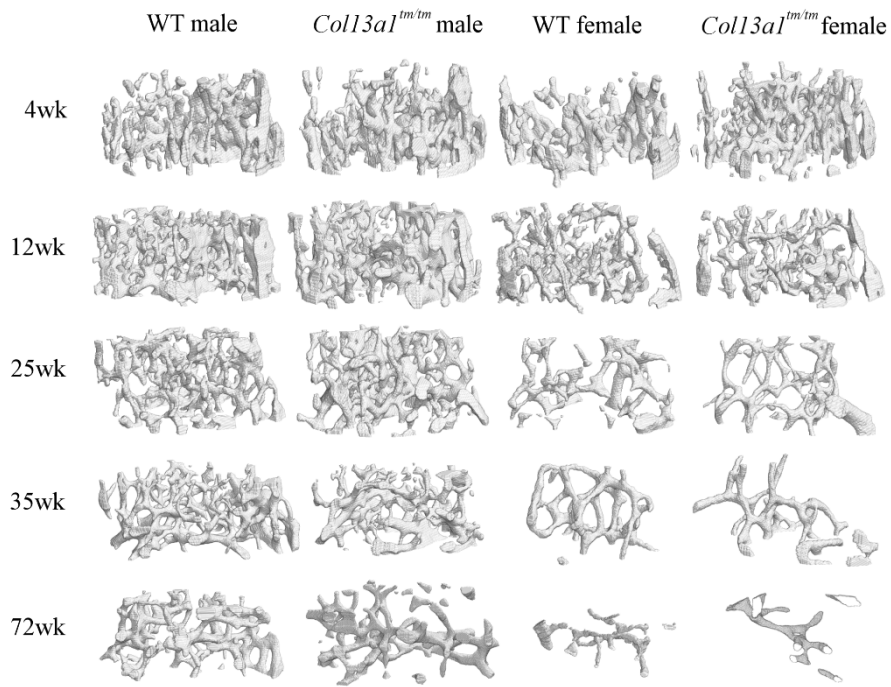

Fig S2. Representative 3D reconstruction images of distal femoral trabecular bone in male and female *Col13a1*<sup>tm/tm</sup> mice and respective WT controls. Visual inspection of metaphyseal trabecular bone did not show clear differences between the *Col13a1*<sup>tm/tm</sup> and WT samples in either gender at any time point studied.

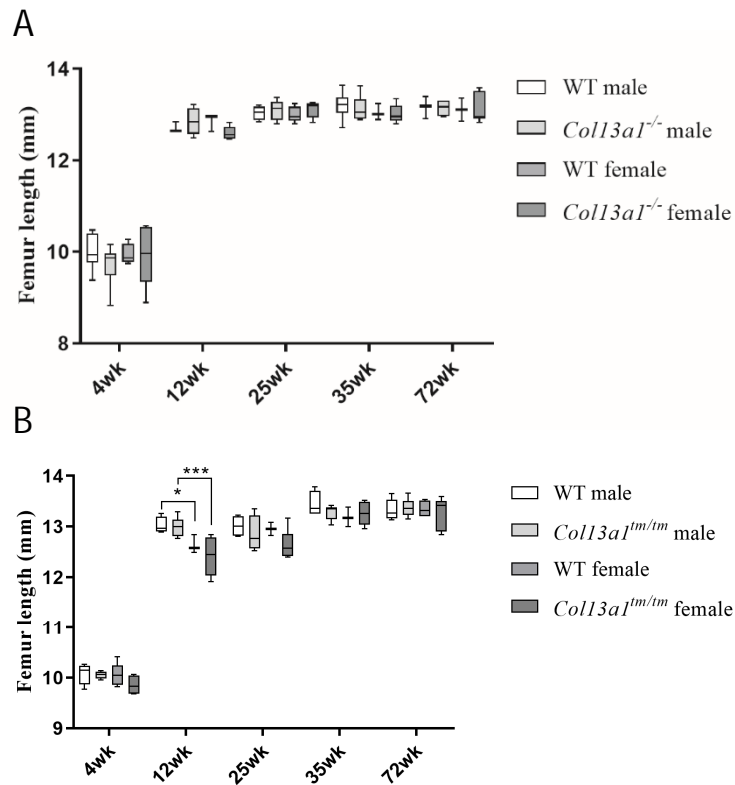

Fig S3. Femoral length of the *Col13a1*<sup>-/-</sup> (A) and *Col13a1*<sup>tm/tm</sup> (B) male and female mice and respective WT controls. The femoral length was unaltered in the *Col13a1*<sup>-/-</sup> and *Col13a1*<sup>tm/tm</sup> mice compared to the WT controls. n(WT male): 3-6; n(*Col13a1*<sup>-/-</sup> male): 4-7; n(WT female): 3-6; n(*Col13a1*<sup>-/-</sup> female): 5-6; n(WT male): 4-6; n(*Col13a1*<sup>tm/tm</sup> male): 4-6; n(WT female): 2-6; n(*Col13a1*<sup>tm/tm</sup> female): 4-6; the whiskers represent the total range of the dataset (min to max).

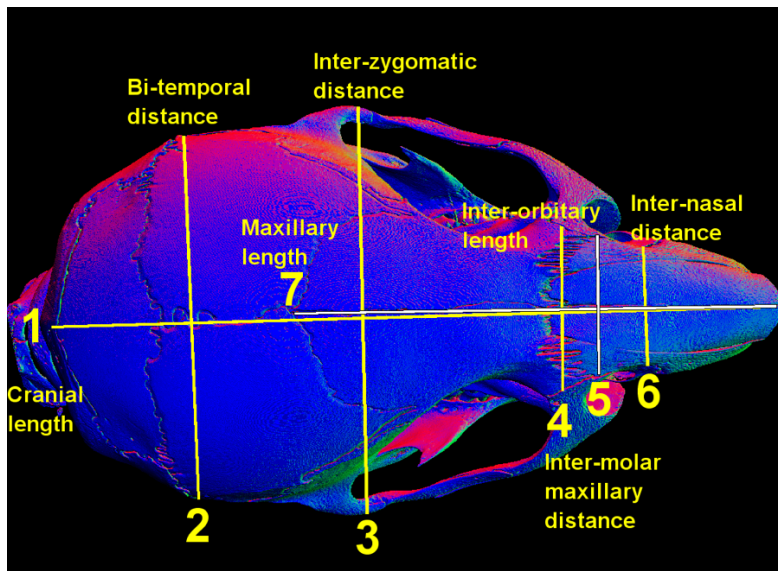

Fig S4. The top view image and its measurements.

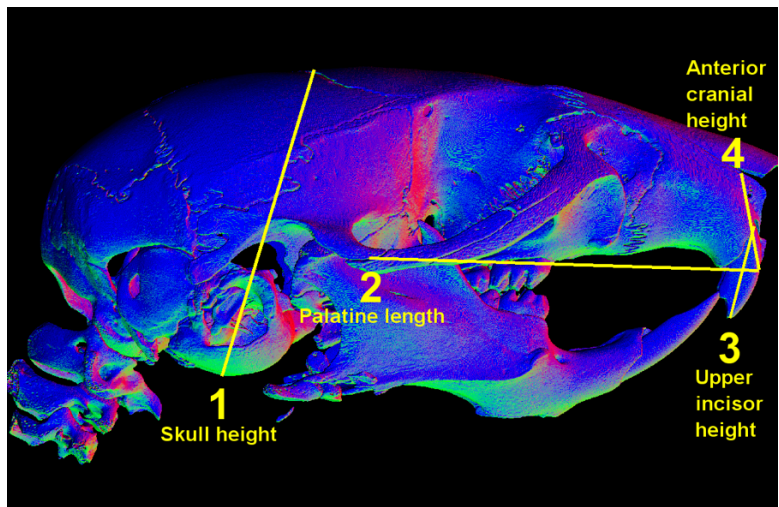

Fig S5. The first side view image and its measurements.

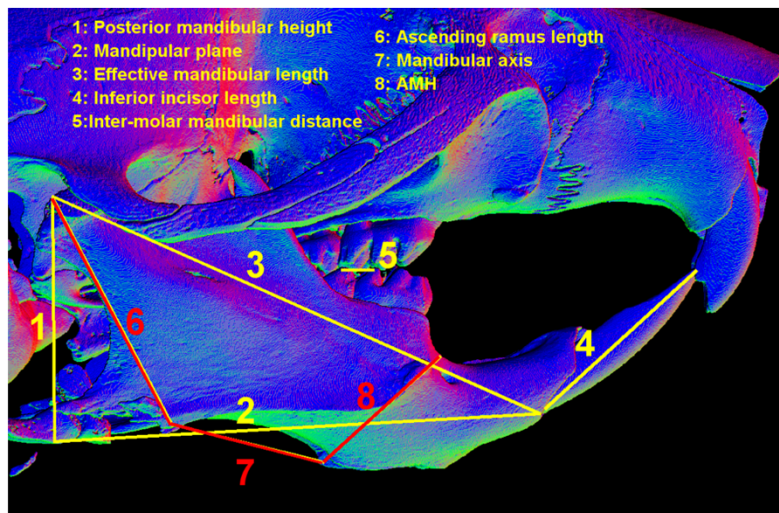

Fig S6. The second side view image and its measurements.

Table S1. List of morphometric parameters and their definitions as they are used in this study. Morphometric parameters are defined here as measured distances between two anatomic points in 2D sagittal and transverse projection images. Morphometric parameters are divided into three categories (craniofacial, maxillary and mandibular) based on their anatomic localization. Modified from Eimar et al. 2016.

| Craniofacial          |     | Maxillary                     |     | Mandibular                     |     |
|-----------------------|-----|-------------------------------|-----|--------------------------------|-----|
| Cranial length        | A-K | Maxillary length              | D-K | Effective mandibular length    | N-T |
| Skull height          | L-M | Palatine length               | P-W | Mandibular plane               | O-T |
| Internasal distance   | I-J | Anterior cranial height       | Y-W | Inferior Incisor length        | T-U |
| Interorbital length   | G-H | Upper incisor length          | V-X | Ascending ramus length         | N-Q |
| Interzygomatic length | E-F | Intermolar maxillary distance | I-J | Posterior mandibular height    | N-O |
| Bi-temporal distance  | B-C |                               |     | Intermolar mandibular distance | R-S |

Table S2. Cephalometric analysis of the male and female Col13a1<sup>-/-</sup> mice and respective controls at the ages of 4 and 35 weeks. The mean is presented as the result for each group. Several parameters were significantly altered in the Col13a1<sup>-/-</sup> samples at both time points. n(male): 4-5; n(female): 4-5; \*, q<0.05; \*\*, q<0.01; \*\*\*, q<0.001 determined by two-way ANOVA and followed by the false discovery rate.

| Male                            | 4 wk  |      |                |      |       | 35 wk |      |               |      |       |
|---------------------------------|-------|------|----------------|------|-------|-------|------|---------------|------|-------|
|                                 | +/+   | SD   | -/-            | SD   | q     | +/+   | SD   | -/-           | SD   | q     |
|                                 | (mm)  |      |                |      |       |       |      |               |      |       |
| Cranial length                  | 19,77 | 0,74 | 19,57          | 0,63 | 0,236 | 22,89 | 0,69 | 22,53         | 0,23 | 0,188 |
| Skull height                    | 9,09  | 0,17 | 9,13           | 0,20 | 0,815 | 9,17  | 0,15 | 9,38          | 0,12 | 0,227 |
| Internasal distance             | 3,48  | 0,08 | <b>3,38*</b>   | 0,02 | 0,035 | 3,74  | 0,08 | 3,73          | 0,05 | 0,250 |
| Interorbital length             | 5,12  | 0,10 | 5,15           | 0,04 | 0,222 | 5,53  | 0,10 | <b>5,41*</b>  | 0,07 | 0,039 |
| Interzygomatic length           | 11,41 | 0,26 | <b>11,08*</b>  | 0,24 | 0,030 | 12,49 | 0,23 | 12,55         | 0,09 | 0,249 |
| Bi-temporal distance            | 10,23 | 0,14 | 10,21          | 0,10 | 0,305 | 10,55 | 0,10 | 10,48         | 0,14 | 0,188 |
| Maxillary length                | 13,23 | 0,44 | 13,07          | 0,51 | 0,231 | 16,26 | 0,56 | 15,74         | 0,19 | 0,058 |
| Palatine length                 | 11,29 | 0,14 | 10,94          | 0,42 | 0,055 | 13,55 | 0,30 | 13,54         | 0,14 | 0,330 |
| Anterior cranial height         | 2,34  | 0,02 | 2,34           | 0,08 | 0,339 | 2,81  | 0,07 | 2,78          | 0,05 | 0,260 |
| Upper incisor length            | 3,01  | 0,08 | 2,92           | 0,14 | 0,133 | 3,55  | 0,14 | 3,54          | 0,07 | 0,344 |
| Intermolar maxillary distance   | 4,12  | 0,12 | 4,20           | 0,05 | 0,105 | 4,43  | 0,08 | 4,39          | 0,05 | 0,190 |
| Effective mandibular length     | 9,59  | 0,06 | <b>9,11**</b>  | 0,27 | 0,002 | 11,35 | 0,27 | 11,35         | 0,13 | 0,173 |
| Mandibular plane                | 7,15  | 0,24 | 6,93           | 0,21 | 0,092 | 7,95  | 0,25 | 7,90          | 0,16 | 0,277 |
| Inferior incisor length         | 3,98  | 0,10 | 3,96           | 0,11 | 0,268 | 4,74  | 0,13 | <b>4,89*</b>  | 0,12 | 0,043 |
| Ascending ramus length          | 4,79  | 0,09 | <b>4,68*</b>   | 0,22 | 0,046 | 5,80  | 0,19 | 5,79          | 0,11 | 0,311 |
| Posterior mandibular height     | 4,74  | 0,10 | 4,61           | 0,20 | 0,096 | 5,39  | 0,11 | 5,55          | 0,13 | 0,072 |
| Inter-molar mandibular distance | 0,55  | 0,01 | 0,58           | 0,04 | 0,819 | 0,56  | 0,04 | 0,54          | 0,04 | 0,852 |
| Female                          | +/+   | SD   | -/-            | SD   | q     | +/+   | SD   | -/-           | SD   | q     |
|                                 | (mm)  |      |                |      |       |       |      |               |      |       |
| Cranial length                  | 19,79 | 0,68 | 19,25          | 0,91 | 0,134 | 22,30 | 0,33 | 22,07         | 0,56 | 0,229 |
| Skull height                    | 9,09  | 0,21 | 8,89           | 0,18 | 0,343 | 9,21  | 0,14 | 9,26          | 0,15 | 0,731 |
| Internasal distance             | 3,46  | 0,08 | 3,35           | 0,10 | 0,282 | 3,58  | 0,06 | 3,55          | 0,12 | 0,730 |
| Interorbital length             | 5,04  | 0,06 | 5,02           | 0,10 | 0,226 | 5,22  | 0,02 | 5,30          | 0,07 | 0,064 |
| Interzygomatic length           | 11,35 | 0,12 | <b>10,86**</b> | 0,36 | 0,004 | 12,09 | 0,11 | 12,09         | 0,22 | 0,174 |
| Bi-temporal distance            | 10,28 | 0,04 | 10,12          | 0,11 | 0,138 | 10,44 | 0,15 | 10,38         | 0,13 | 0,394 |
| Maxillary length                | 13,29 | 0,61 | 12,71          | 0,85 | 0,102 | 15,74 | 0,33 | 15,41         | 0,41 | 0,166 |
| Palatine length                 | 11,39 | 0,21 | 10,97          | 0,58 | 0,063 | 13,43 | 0,11 | 13,13         | 0,30 | 0,094 |
| Anterior cranial height         | 2,40  | 0,05 | 2,37           | 0,02 | 0,216 | 2,73  | 0,10 | 2,68          | 0,05 | 0,130 |
| Upper incisor length            | 3,07  | 0,08 | <b>2,94*</b>   | 0,04 | 0,023 | 3,51  | 0,11 | <b>3,33**</b> | 0,15 | 0,007 |
| Intermolar maxillary distance   | 4,17  | 0,07 | 4,07           | 0,10 | 0,402 | 4,19  | 0,09 | 4,26          | 0,10 | 0,462 |
| Effective mandibular length     | 9,75  | 0,23 | <b>9,17**</b>  | 0,35 | 0,001 | 11,20 | 0,12 | <b>10,91*</b> | 0,13 | 0,020 |
| Mandibular plane                | 7,31  | 0,26 | <b>6,81*</b>   | 0,29 | 0,013 | 7,46  | 0,07 | 7,57          | 0,16 | 0,253 |
| Inferior incisor length         | 3,95  | 0,15 | 3,89           | 0,22 | 0,247 | 4,91  | 0,10 | 4,85          | 0,17 | 0,247 |
| Ascending ramus length          | 4,86  | 0,30 | <b>4,55*</b>   | 0,25 | 0,033 | 6,01  | 0,09 | <b>5,64*</b>  | 0,15 | 0,018 |
| Posterior mandibular height     | 4,75  | 0,28 | <b>4,45*</b>   | 0,26 | 0,039 | 5,47  | 0,07 | 5,25          | 0,13 | 0,062 |
| Inter-molar mandibular distance | 0,56  | 0,02 | 0,51           | 0,02 | 0,064 | 0,58  | 0,04 | 0,54          | 0,03 | 0,129 |

Table S3. Cephalometric analysis of the male and female Col13a1<sup>tm/tm</sup> mice and respective controls at the ages of 4 and 35 weeks. The mean is presented as the result for each group. Statistically significant differences were mostly found in the 35-week-old Col13a1<sup>tm/tm</sup> male samples, where several parameters were increased. There were no statistically significant differences between the female Col13a1<sup>tm/tm</sup> mice and the respective controls at either time point. n(male): 3-6; n(female): 3-4. \*, q<0.05; \*\*, q<0.01; \*\*\*, q<0.001 determined by two-way ANOVA and followed by the false discovery rate.

|                                 | 4 wk  |      |              |      |        | 35 wk |      |                |      |       |
|---------------------------------|-------|------|--------------|------|--------|-------|------|----------------|------|-------|
|                                 | +/+   | SD   | tm/tm        | SD   | q      | +/+   | SD   | tm/tm          | SD   | q     |
| Male                            | (mm)  |      |              |      |        |       |      |                |      |       |
| Cranial length                  | 20,09 | 0,30 | 20,22        | 0,12 | 0,199  | 21,78 | 0,63 | 22,13          | 0,25 | 0,103 |
| Skull height                    | 9,04  | 0,26 | 9,08         | 0,11 | 0,870  | 9,29  | 0,09 | 9,11           | 0,11 | 0,470 |
| Internasal distance             | 3,41  | 0,07 | 3,40         | 0,03 | 0,306  | 3,70  | 0,11 | 3,76           | 0,02 | 0,109 |
| Interorbital length             | 5,10  | 0,11 | 5,13         | 0,09 | 0,422  | 5,27  | 0,13 | 5,43           | 0,05 | 0,070 |
| Interzygomatic length           | 11,36 | 0,12 | 11,38        | 0,09 | 0,311  | 12,23 | 0,36 | <b>12,53*</b>  | 0,09 | 0,026 |
| Bi-temporal distance            | 10,30 | 0,02 | 10,28        | 0,08 | 0,756  | 10,35 | 0,06 | 10,44          | 0,16 | 0,550 |
| Maxillary length                | 13,30 | 0,33 | 13,42        | 0,24 | 0,214  | 15,25 | 0,56 | 15,62          | 0,16 | 0,088 |
| Palatine length                 | 11,34 | 0,15 | 11,39        | 0,16 | 0,138  | 12,89 | 0,59 | <b>13,47**</b> | 0,09 | 0,006 |
| Anterior cranial height         | 2,40  | 0,08 | 2,41         | 0,03 | 0,302  | 2,72  | 0,10 | 2,86*          | 0,07 | 0,018 |
| Upper incisor length            | 3,06  | 0,09 | <b>2,97*</b> | 0,07 | 0,035* | 3,39  | 0,13 | <b>3,59**</b>  | 0,11 | 0,007 |
| Intermolar maxillary distance   | 4,16  | 0,05 | 4,10         | 0,04 | 0,078  | 4,36  | 0,10 | <b>4,45*</b>   | 0,07 | 0,043 |
| Effective mandibular length     | 9,68  | 0,2  | 9,68         | 0,07 | 0,349  | 10,90 | 0,45 | 11,04          | 0,11 | 0,206 |
| Mandibular plane                | 7,15  | 0,15 | 7,17         | 0,28 | 0,318  | 7,90  | 0,18 | 7,84           | 0,21 | 0,318 |
| Inferior incisor length         | 3,99  | 0,07 | 4,08         | 0,06 | 0,147  | 4,71  | 0,25 | 4,93           | 0,20 | 0,051 |
| Ascending ramus length          | 4,89  | 0,06 | 4,82         | 0,07 | 0,079  | 5,55  | 0,27 | <b>5,86**</b>  | 0,12 | 0,004 |
| Posterior mandibular height     | 4,86  | 0,04 | <b>4,63*</b> | 0,19 | 0,019  | 5,28  | 0,21 | <b>5,51*</b>   | 0,12 | 0,035 |
| Inter-molar mandibular distance | 0,55  | 0,05 | 0,56         | 0,02 | 0,947  | 0,59  | 0,01 | 0,58           | 0,03 | 0,879 |
| Female                          | (mm)  |      |              |      |        |       |      |                |      |       |
| Cranial length                  | 20,00 | 0,45 | 19,94        | 0,33 | 0,288  | 22,35 | 0,30 | 22,22          | 0,30 | 0,286 |
| Skull height                    | 9,10  | 0,10 | 9,08         | 0,08 | 0,930  | 9,27  | 0,13 | 9,18           | 0,13 | 0,494 |
| Internasal distance             | 3,38  | 0,04 | 3,40         | 0,08 | 0,212  | 3,70  | 0,04 | 3,76           | 0,04 | 0,091 |
| Interorbital length             | 5,05  | 0,07 | 5,08         | 0,18 | 0,550  | 5,29  | 0,09 | 5,36           | 0,09 | 0,426 |
| Interzygomatic length           | 11,29 | 0,16 | 11,37        | 0,28 | 0,214  | 12,24 | 0,09 | 12,15          | 0,09 | 0,214 |
| Bi-temporal distance            | 10,23 | 0,12 | 10,18        | 0,08 | 0,685  | 10,38 | 0,10 | 10,36          | 0,10 | 0,893 |
| Maxillary length                | 13,47 | 0,45 | 13,27        | 0,22 | 0,154  | 15,60 | 0,17 | 15,20          | 0,17 | 0,067 |
| Palatine length                 | 11,20 | 0,26 | 11,12        | 0,31 | 0,223  | 13,62 | 0,07 | 13,34          | 0,07 | 0,069 |
| Anterior cranial height         | 2,36  | 0,03 | 2,41         | 0,11 | 0,190  | 2,71  | 0,12 | 2,73           | 0,12 | 0,291 |
| Upper incisor length            | 2,95  | 0,11 | 3,02         | 0,07 | 0,173  | 3,39  | 0,13 | 3,59           | 0,13 | 0,087 |
| Intermolar maxillary distance   | 4,15  | 0,04 | 4,11         | 0,10 | 0,158  | 3,69  | 0,04 | 3,62           | 0,04 | 0,113 |
| Effective mandibular length     | 9,64  | 0,26 | 9,54         | 0,18 | 0,249  | 11,25 | 0,18 | 11,24          | 0,18 | 0,332 |
| Mandibular plane                | 7,30  | 0,25 | 7,08         | 0,31 | 0,381  | 7,57  | 0,05 | 7,38           | 0,05 | 0,425 |
| Inferior incisor length         | 3,91  | 0,17 | 4,08         | 0,18 | 0,076  | 5,03  | 0,10 | 4,99           | 0,10 | 0,272 |
| Ascending ramus length          | 4,87  | 0,11 | 4,80         | 0,15 | 0,201  | 6,00  | 0,13 | 6,07           | 0,13 | 0,201 |
| Posterior mandibular height     | 4,87  | 0,17 | 4,71         | 0,12 | 0,069  | 5,50  | 0,10 | 5,49           | 0,10 | 0,318 |
| Inter-molar mandibular distance | 0,54  | 0,03 | 0,57         | 0,01 | 0,445  | 0,59  | 0,03 | 0,56           | 0,03 | 0,445 |



male

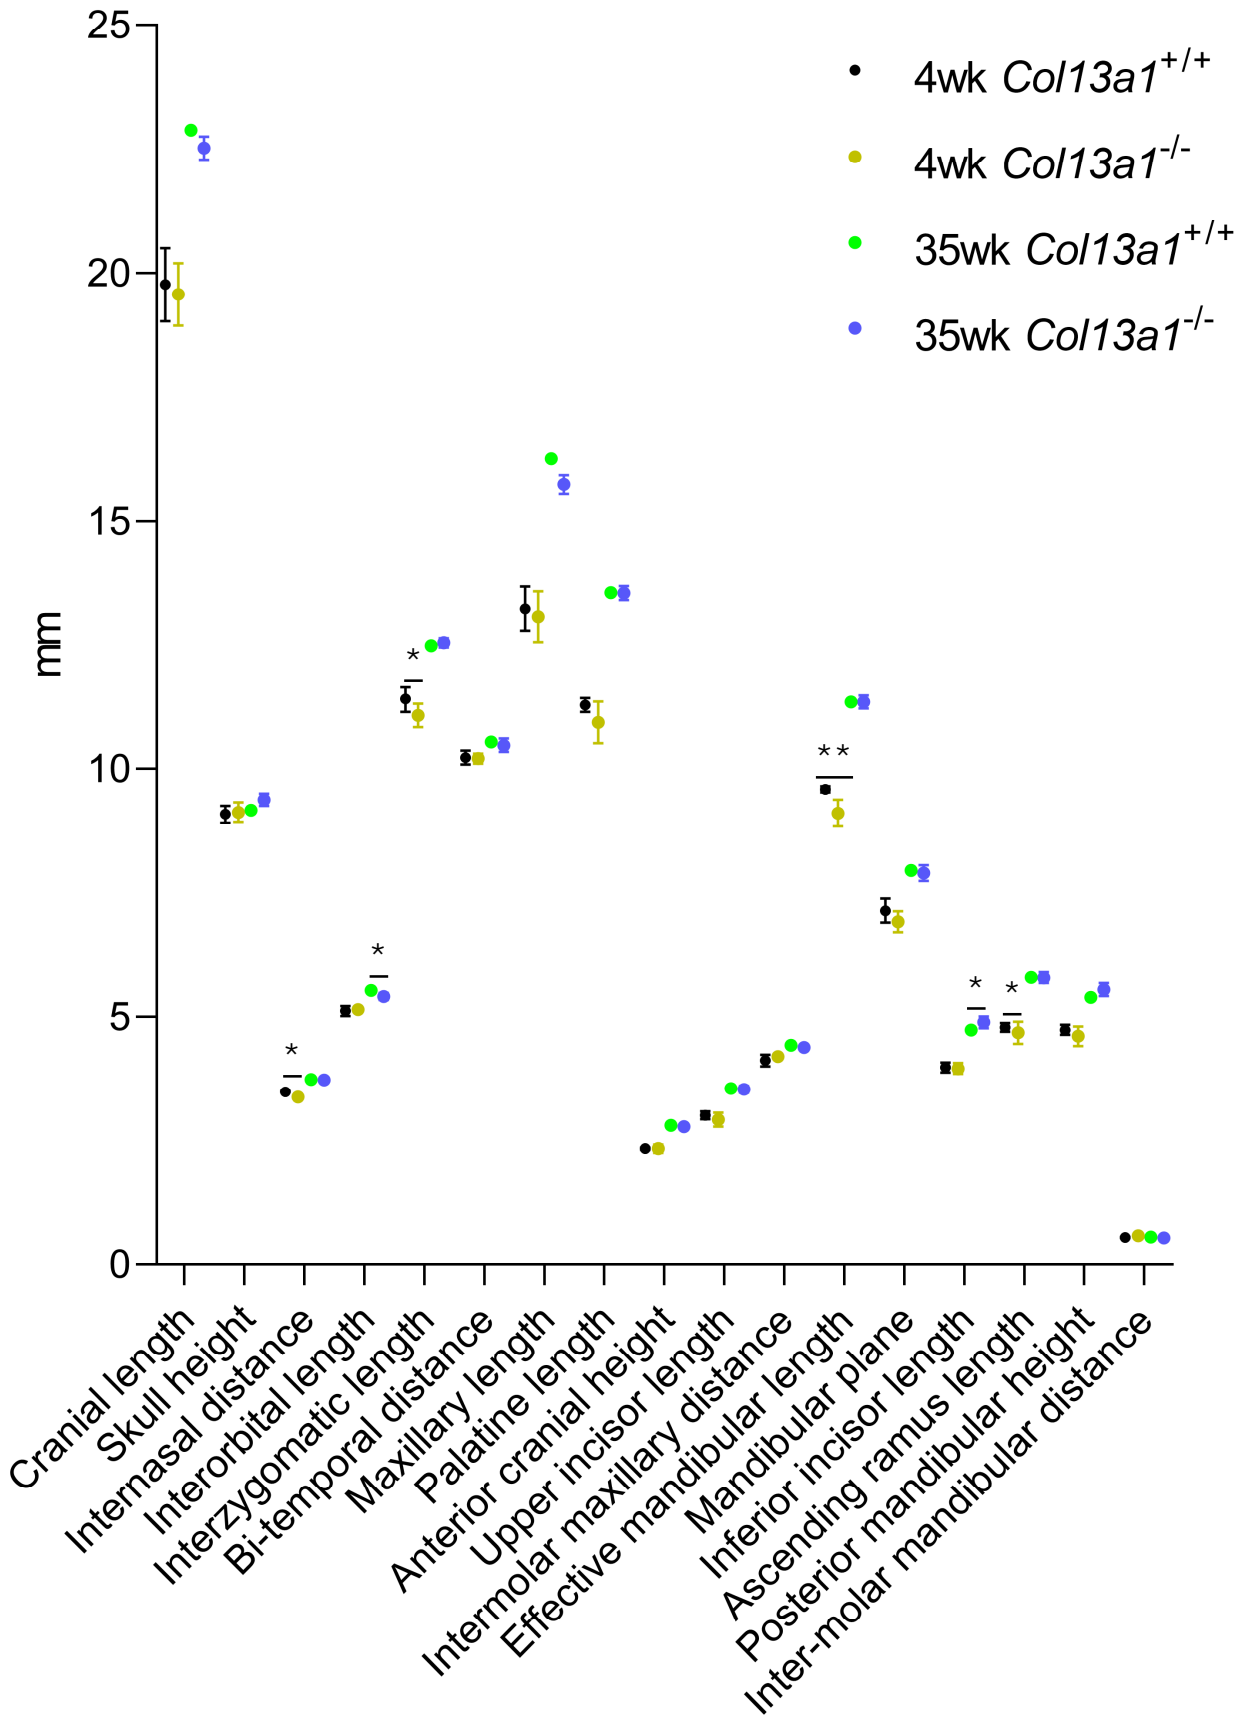

Fig S7. Cephalometric analysis of the male *Col13a1*<sup>-/-</sup> mice and respective controls at the ages of 4 and 35 weeks presented as mean±SD. n: 4-5; \*, q<0.05; \*\*, q<0.01; determined by two-way ANOVA and followed by the false discovery rate.

female

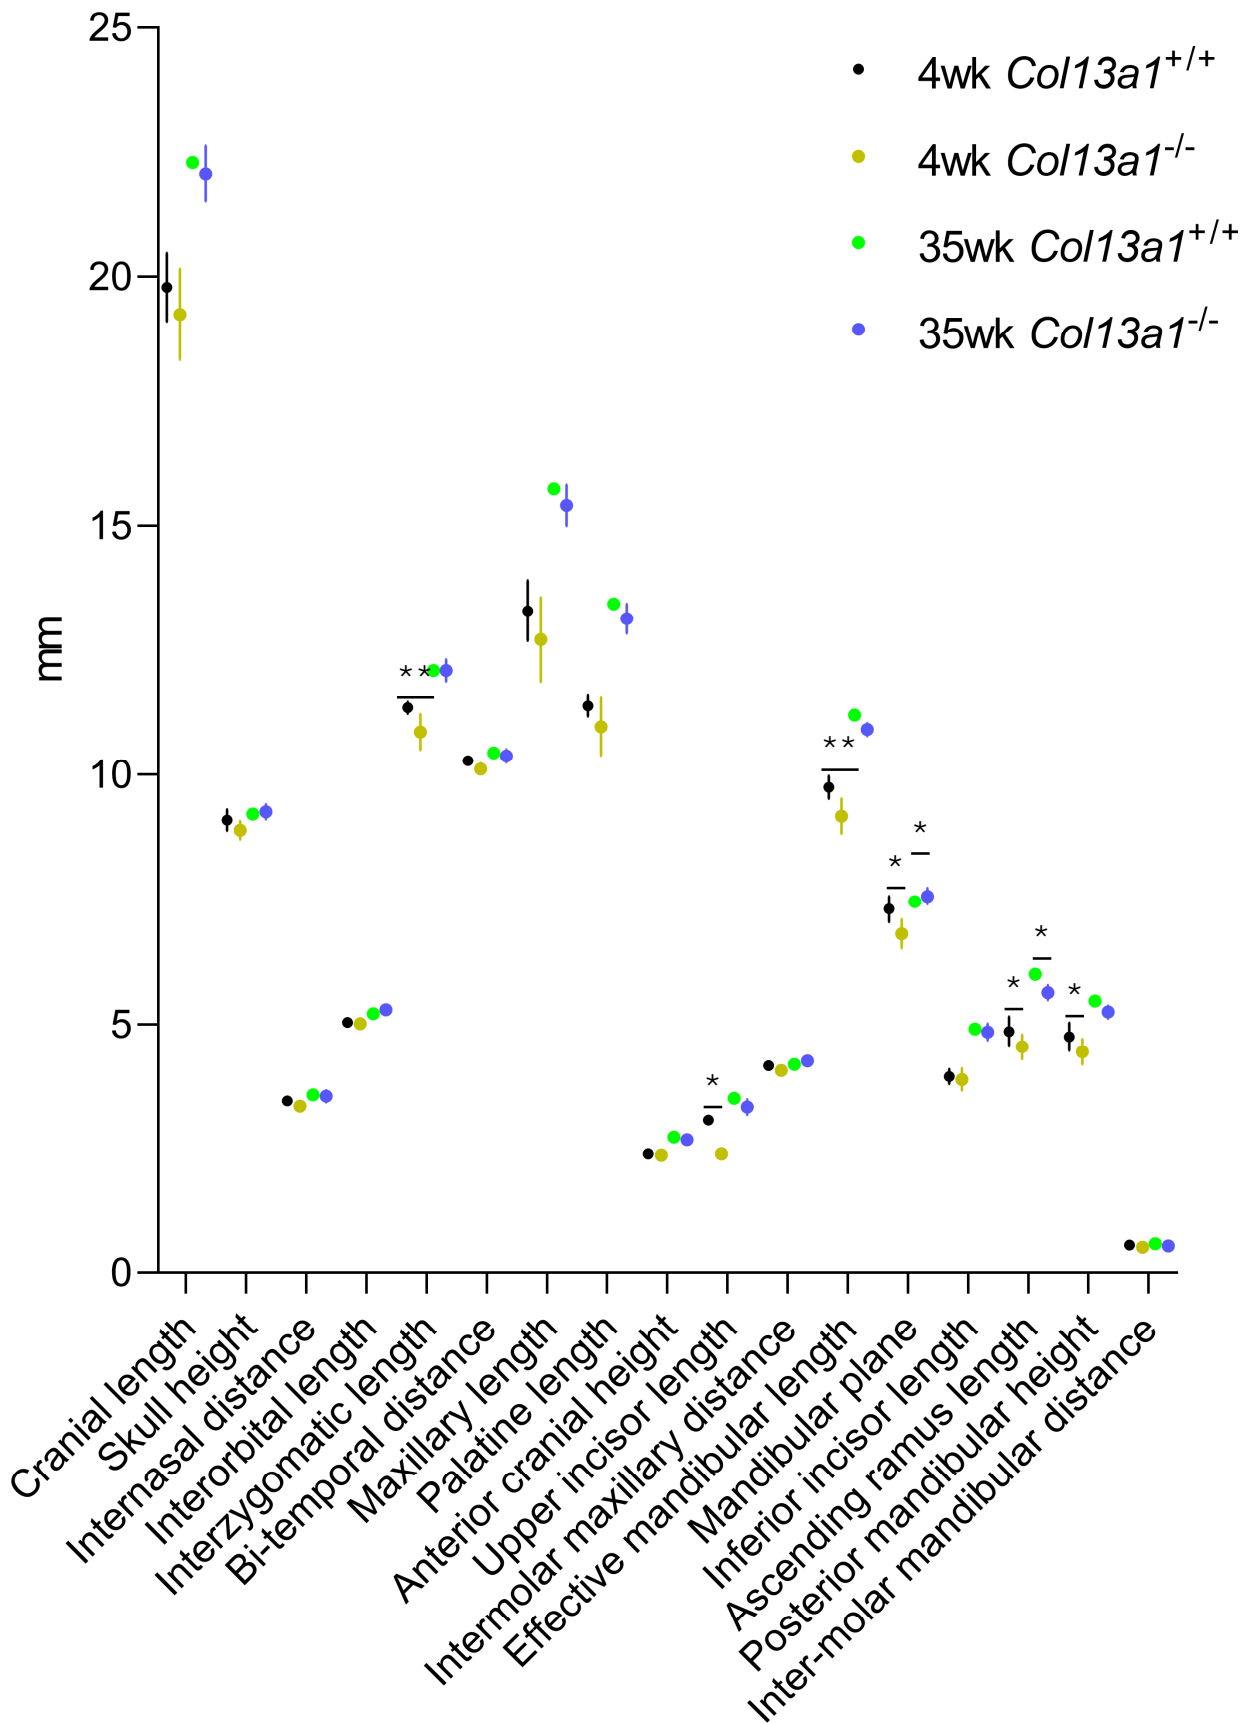

Fig S8. Cephalometric analysis of the female *Col13a1*<sup>-/-</sup> mice and respective controls at the ages of 4 and 35 weeks presented as mean±SD. n: 4-5; \*, q<0.05; \*\*, q<0.01; determined by two-way ANOVA and followed by the false discovery rate.

male

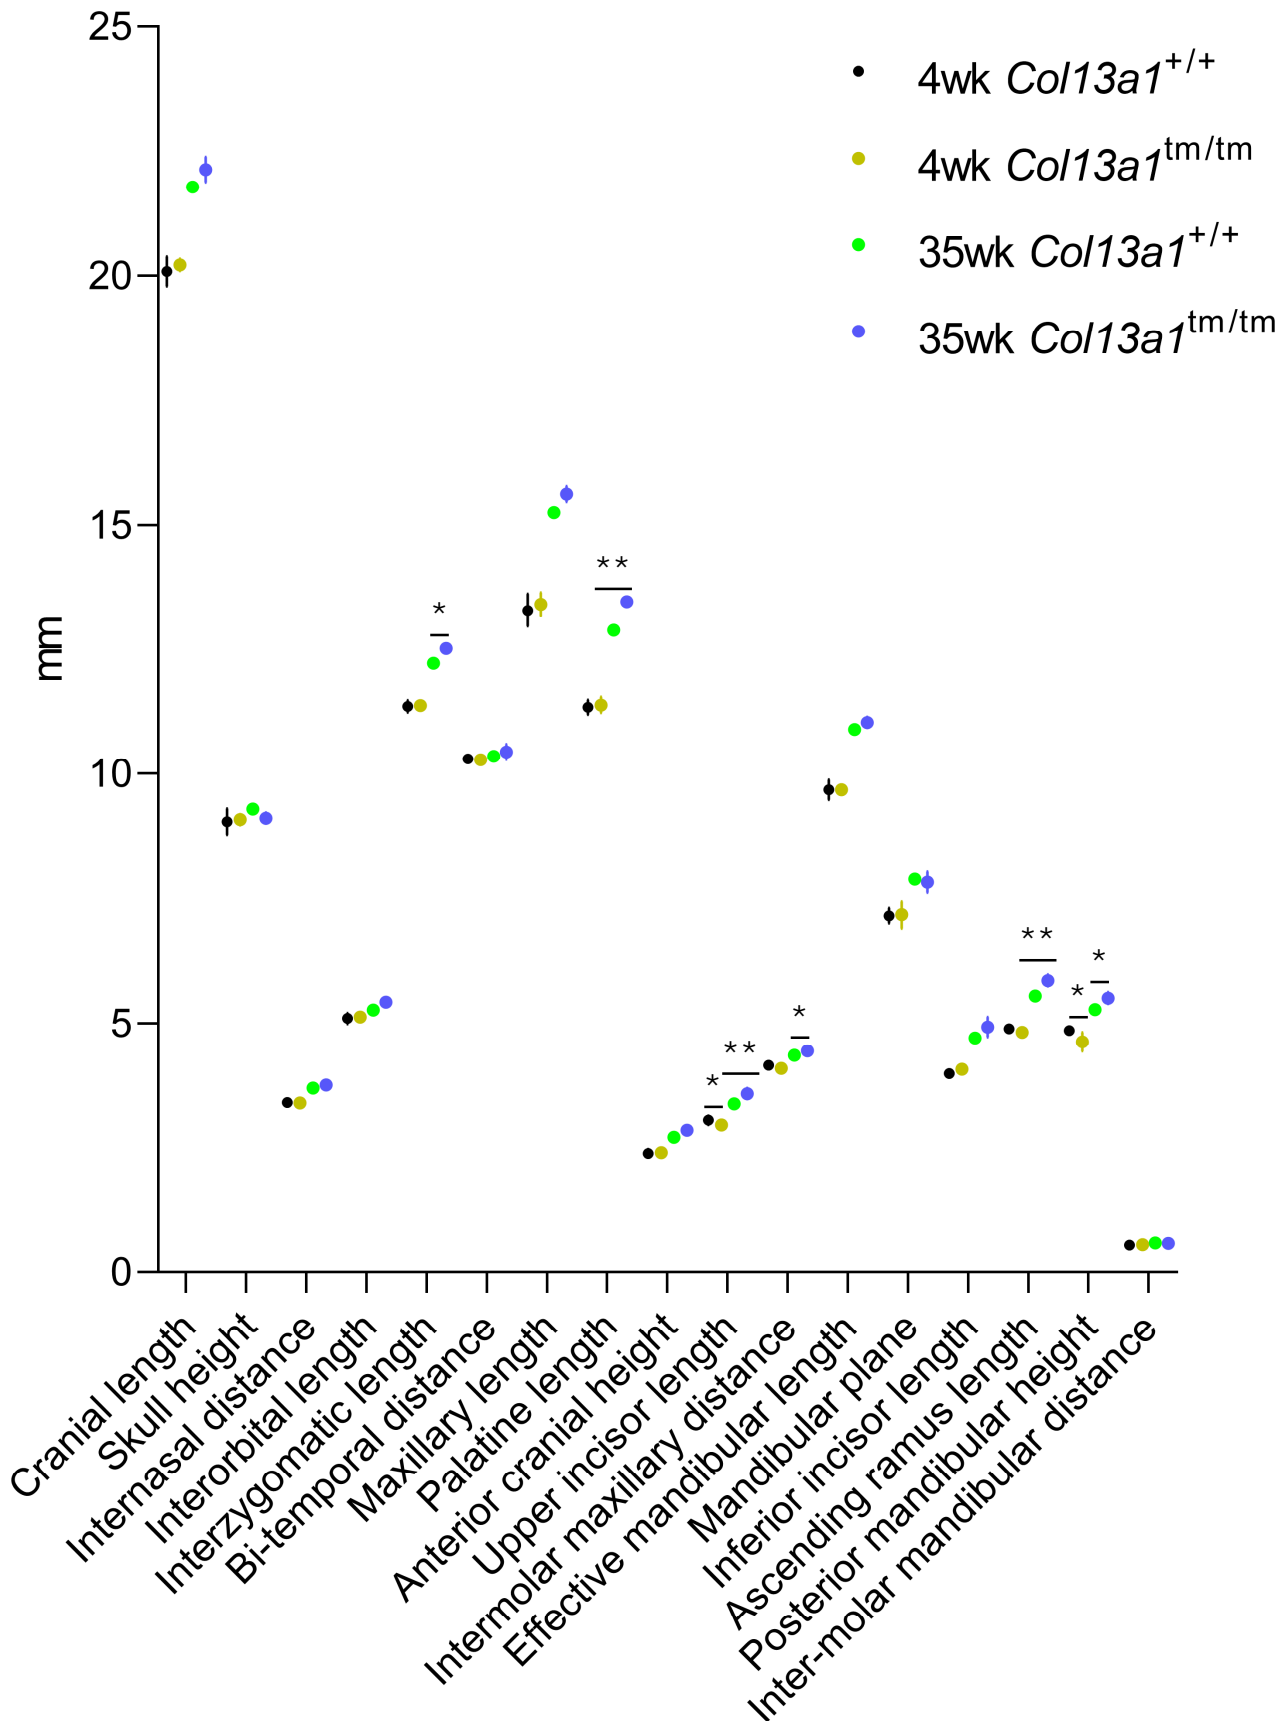

Fig S9. Cephalometric analysis of the male *Col13a1*<sup>tm/tm</sup> mice and respective controls at the ages of 4 and 35 weeks presented as mean±SD. n: 3-6; \*, q<0.05; \*\*, q<0.01; determined by two-way ANOVA and followed by the false discovery rate.

female

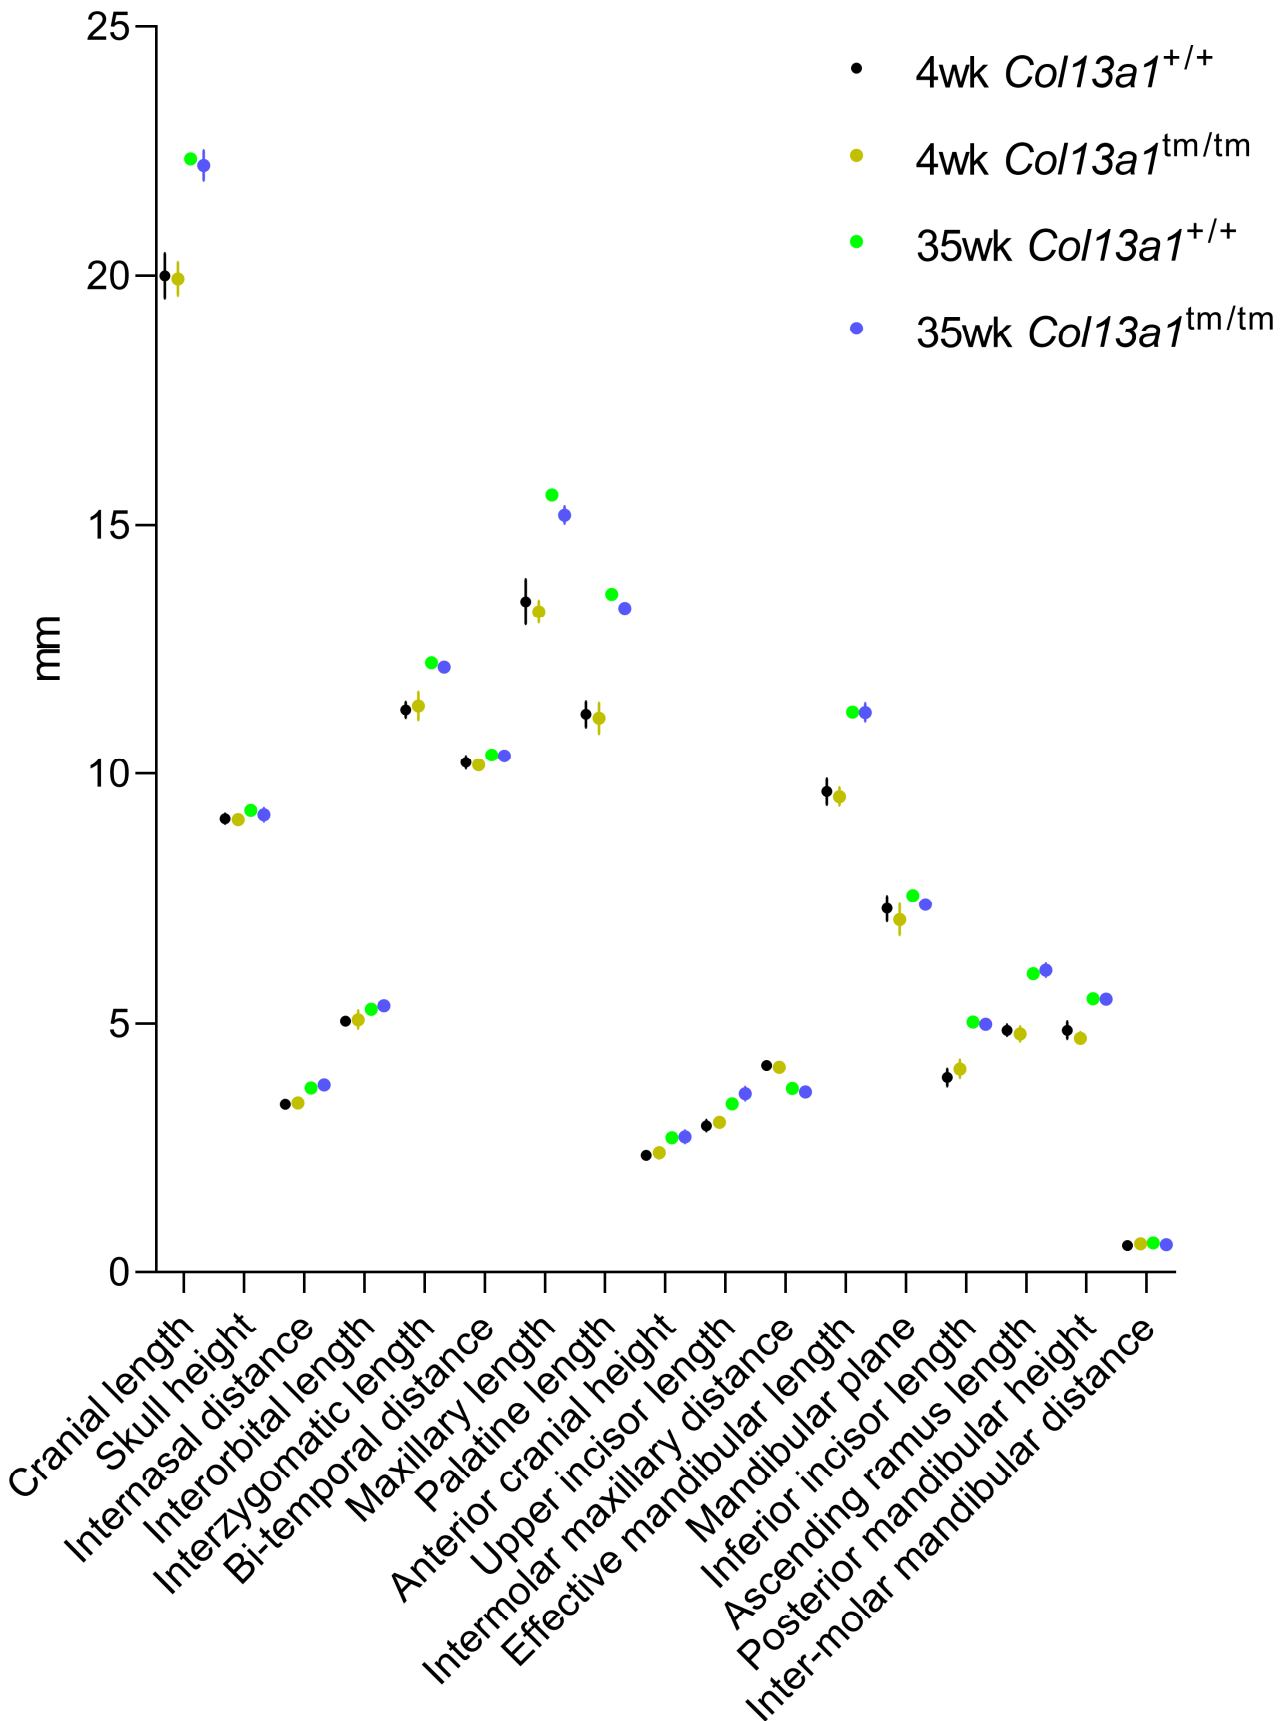

Fig S10. Cephalometric analysis of the female *Col13a1*<sup>tm/tm</sup> mice and respective controls at the ages of 4 and 35 weeks presented as mean±SD. No statistical differences were discovered by two-way ANOVA and followed by the false discovery rate.
